# Supplementary material
Source: PubMed Central journal article supplement (PMC6126386)
Supplement: 4785_2_supp_139025_p8t72y.pdf [file 4785_2_supp_139025_p8t72y.pdf]

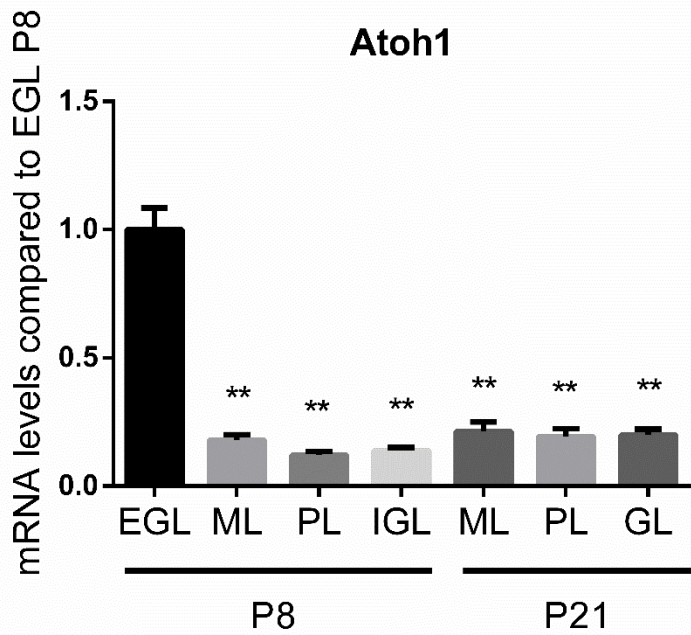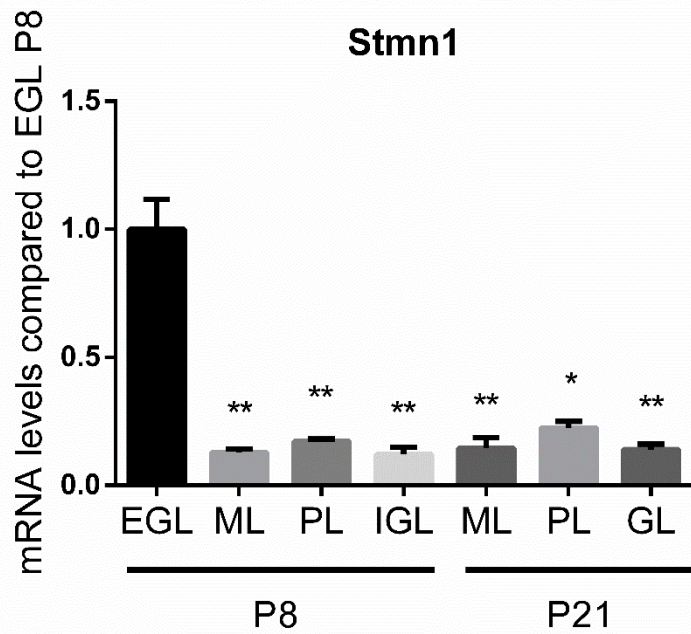

FIG. S1. **Expression of gene markers of the external granule cell layer.** Gene expression was measured by real-time PCR analysis at P8 (postnatal day 8) and P21. Each value is the mean ( $\pm$  SEM) of 4 cerebella. Statistical analysis was performed with the Kruskal-Wallis test followed by Dunn's test: \* $P < 0.05$ , \*\* $P < 0.01$  versus P8 EGL. EGL: external granule cell layer; ML: molecular layer; PL: Purkinje cell layer; IGL: internal granule cell layer; GL: granule cell layer; Atoh1: atonal bHLH transcription factor 1; Stmn1: stathmin 1.

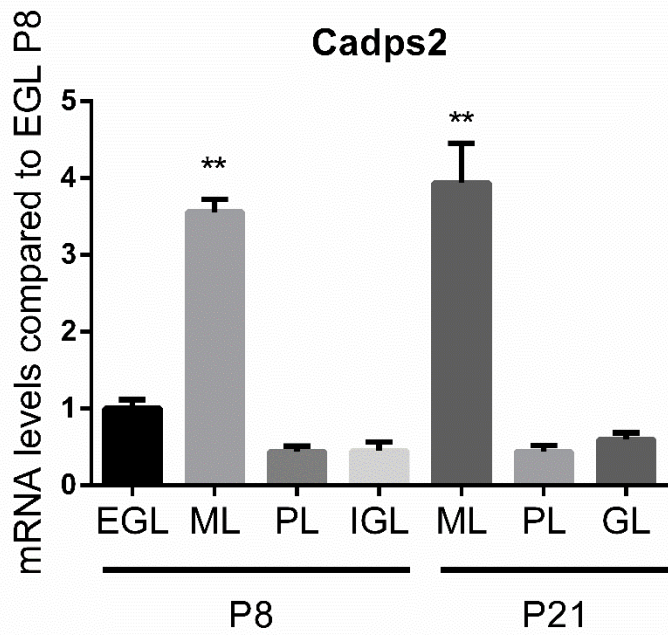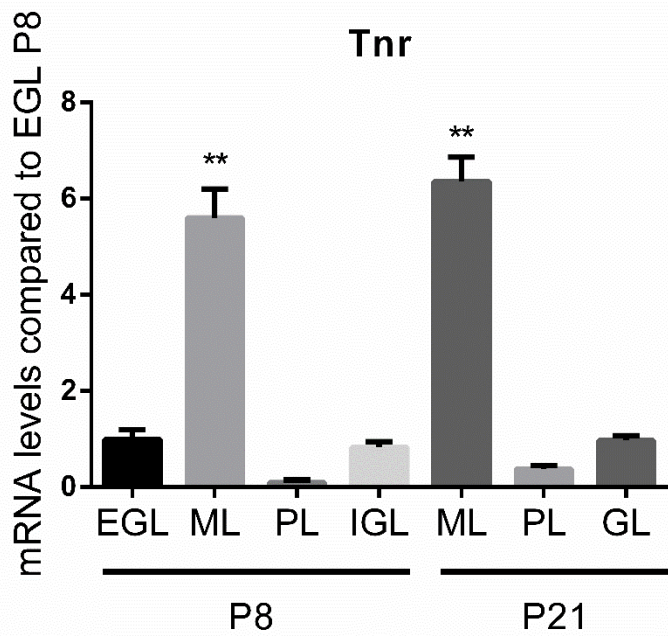

FIG. S2. **Expression of gene markers of the molecular layer.** Gene expression was measured by real-time PCR analysis at P8 (postnatal day 8) and P21. Each value is the mean ( $\pm$  SEM) of 4 cerebella. Statistical analysis was performed with the Kruskal-Wallis test followed by Dunn's test: \* $P < 0.05$ , \*\* $P < 0.01$  versus P8 EGL. EGL: external granule cell layer; ML: molecular layer; PL: Purkinje cell layer; IGL: internal granule cell layer; GL: granule cell layer; Cadps2: calcium-dependent secretion activator 2; Tnr: tenascin R.

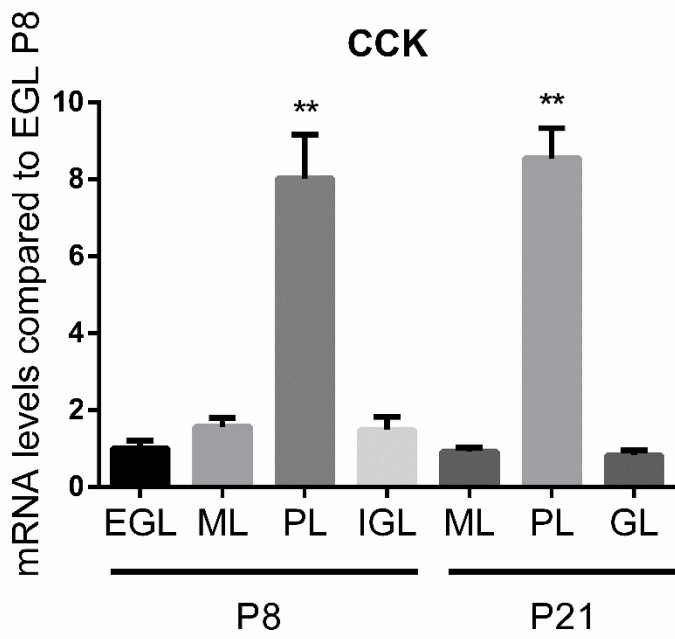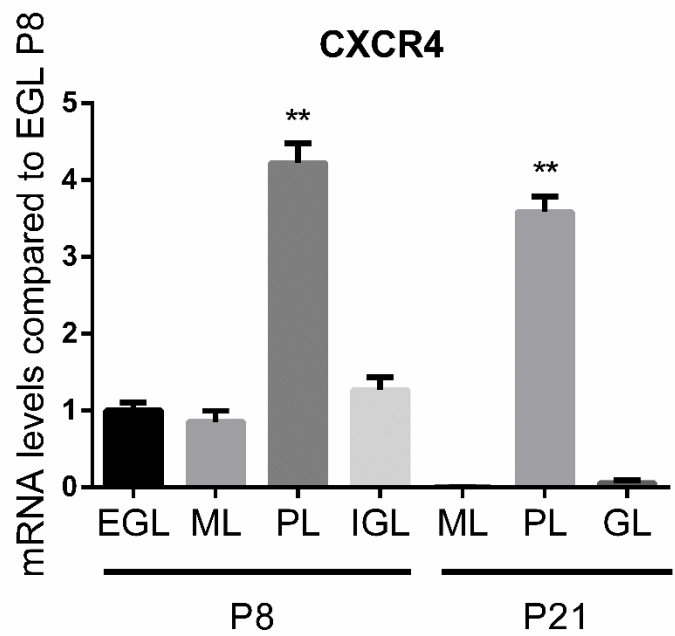

FIG. S3. **Expression of gene markers of the Purkinje cell layer.** Gene expression was measured by real-time PCR analysis at P8 (postnatal day 8) and P21. Each value is the mean ( $\pm$  SEM) of 4 cerebella. Statistical analysis was performed with the Kruskal-Wallis test followed by Dunn's test: \* $P < 0.05$ , \*\* $P < 0.01$  versus P8 EGL. EGL: external granule cell layer; ML: molecular layer; PL: Purkinje cell layer; IGL: internal granule cell layer; GL: granule cell layer; Cck: cholecystokinin; Cxcr4: SDF-1 receptor.

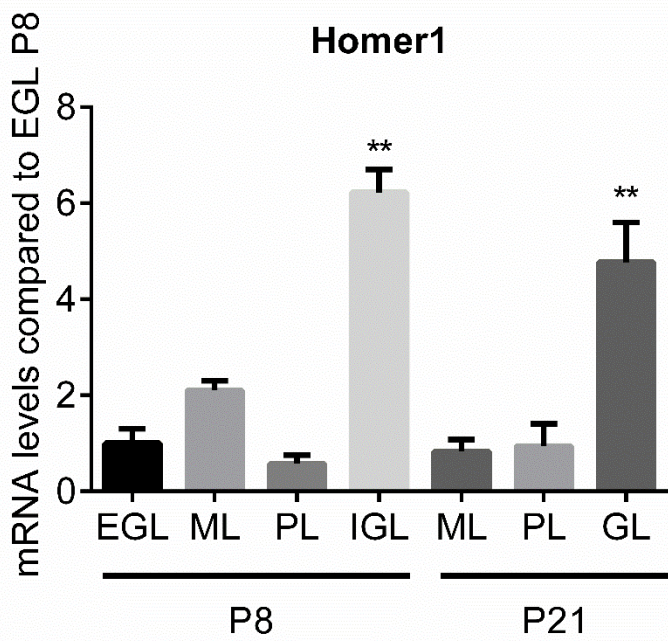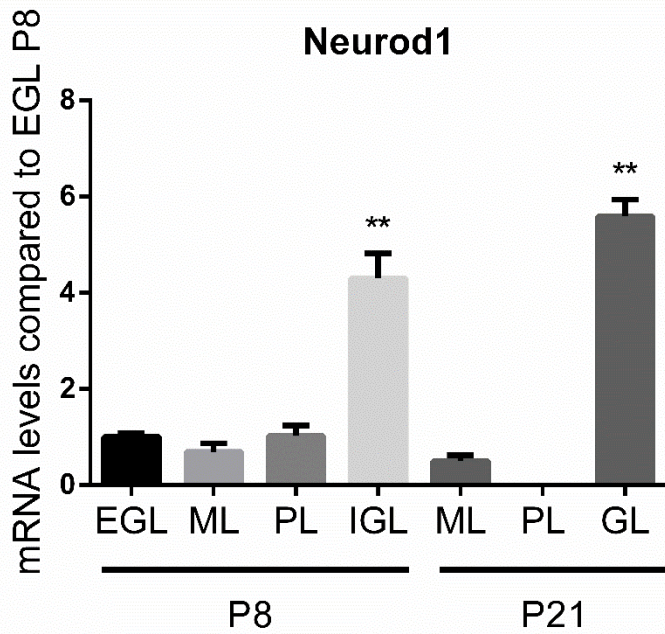

FIG. S4. **Expression of gene markers of the internal granule cell layer.** Gene expression was measured by real-time PCR analysis at P8 (postnatal day 8) and P21. Each value is the mean ( $\pm$  SEM) of 4 cerebella. Statistical analysis was performed with the Kruskal-Wallis test followed by Dunn's test: \* $P < 0.05$ , \*\* $P < 0.01$  versus P8 EGL. EGL: external granule cell layer; ML: molecular layer; PL: Purkinje cell layer; IGL: internal granule cell layer; GL: granule cell layer; Homer1: homer scaffolding protein 1; Neurod1: neurogenic differentiation 1.

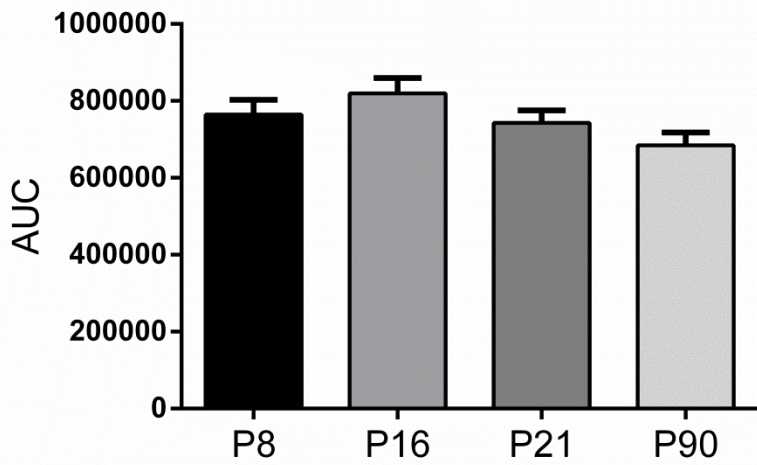

FIG. S5. **AUC measurement of human serum albumin.** Each value is the mean ( $\pm$  SEM) of 10 samples. Statistical analysis was performed with the Kruskal-Wallis test that revealed the lack of significant difference between the groups. AUC: area under the curve.

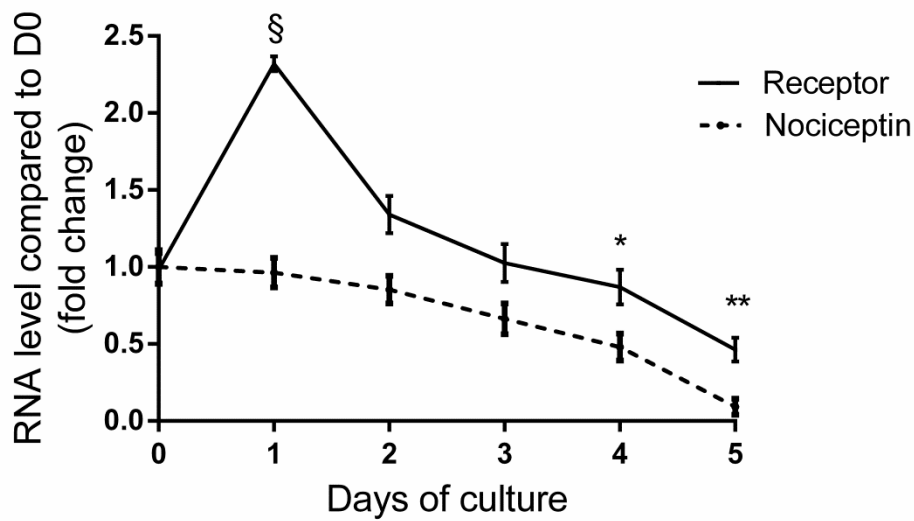

**FIG. S6. Expression of nociceptin and its receptor mRNA in cultured granule neurons.** Gene expression of nociceptin and its receptor genes expression were measured by real-time PCR analysis from plating to 5 days in culture. Each value is the mean ( $\pm$  SEM) of 4 cultures. Statistical analysis was performed with the Kruskal-Wallis test followed by Dunn's test: \* $P < 0.05$ , \*\* $P < 0.01$  versus nociceptin gene expression at D0. §  $P < 0.05$  versus nociceptin receptor gene expression at D0. D0: day of plating.

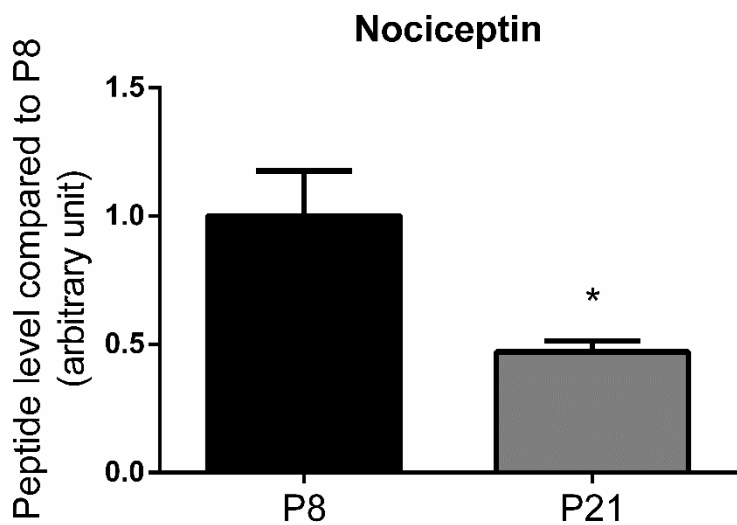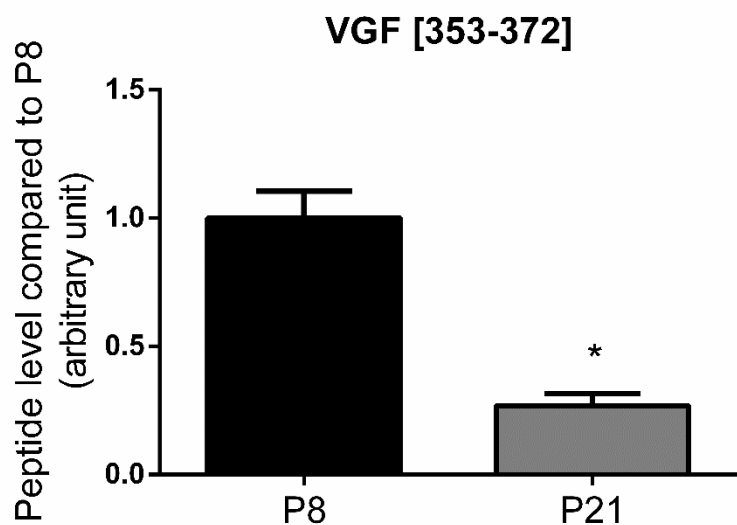

FIG. S7. **Quantification of nociceptin and VGF [353-372] during development.** Relative expression level of nociceptin and VGF [353-372] during development between P8 (postnatal day 8) and P21 was measured by targeted MS/MS. Each value is the mean ( $\pm$  SEM) of 3 samples. Statistical analysis was performed with the Mann-Whitney test: \* $P < 0.05$  versus P8.
